# Supplementary material
Source: PubMed Central journal article supplement (PMC3864584)

Supporting information:

**Figure S1:** mRNA expression of DGK isoforms A)  $\alpha$ , B)  $\delta$ , C)  $\epsilon$ , D)  $\zeta$ , E)  $\theta$ , F)  $\eta$ , G)  $\iota$  in 3T3-L1 cells during adipocyte differentiation. Data are presented as a fold change relative to the expression level of each DGK at day 0 post differentiation. Results are presented as the mean  $\pm$ S.D. \* - values are statistically different with  $p < 0.05$ .

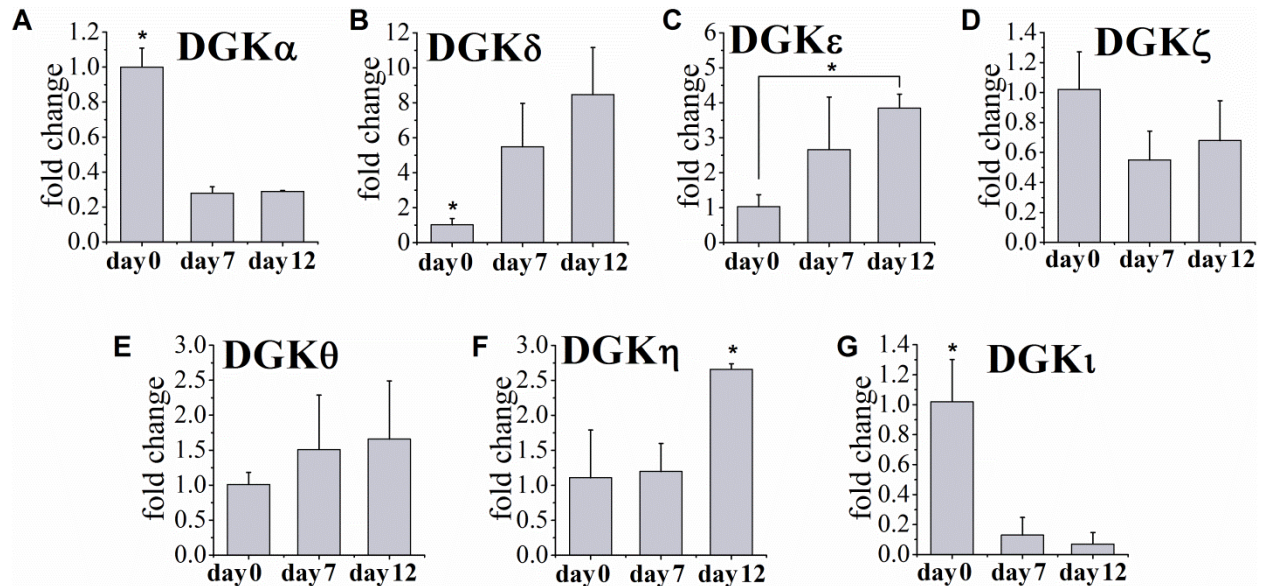

**Figure S2:** mRNA expression of DGK isoforms in white adipose tissue (WAT), brown adipose tissue (BAT), liver, heart, and gastrocnemius muscle of normal wild-type non-agouti mice. DGK expression is normalized by TATA box binding protein (TBP) and presented as the quantity relative to the expression of DGK isoform  $\alpha$  in control mice. Results are presented as the mean  $\pm$ S.D.

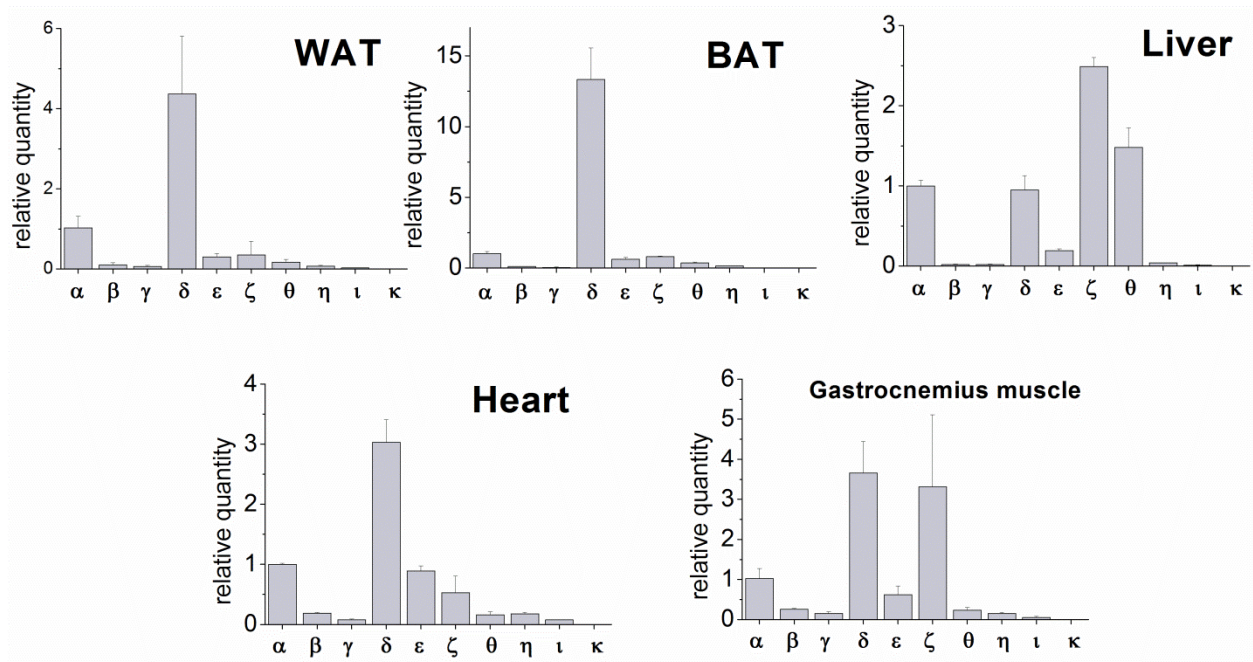

Supplement: NIHMS534567-supplement-1_si_001.pdf [file NIHMS534567-supplement-1_si_001.pdf]
